# Supplementary material for: Mitigative effect of sodium alginate on streptozotocin (STZ)-induced diabetic neuropathy through regulation of redox status and miR-146a in the rat sciatic nerve
Source: PeerJ journal article supplement (doi:10.7717/peerj.19046), 2025-03-24
Supplement: FigureS1.pdf [file FigureS1.pdf]

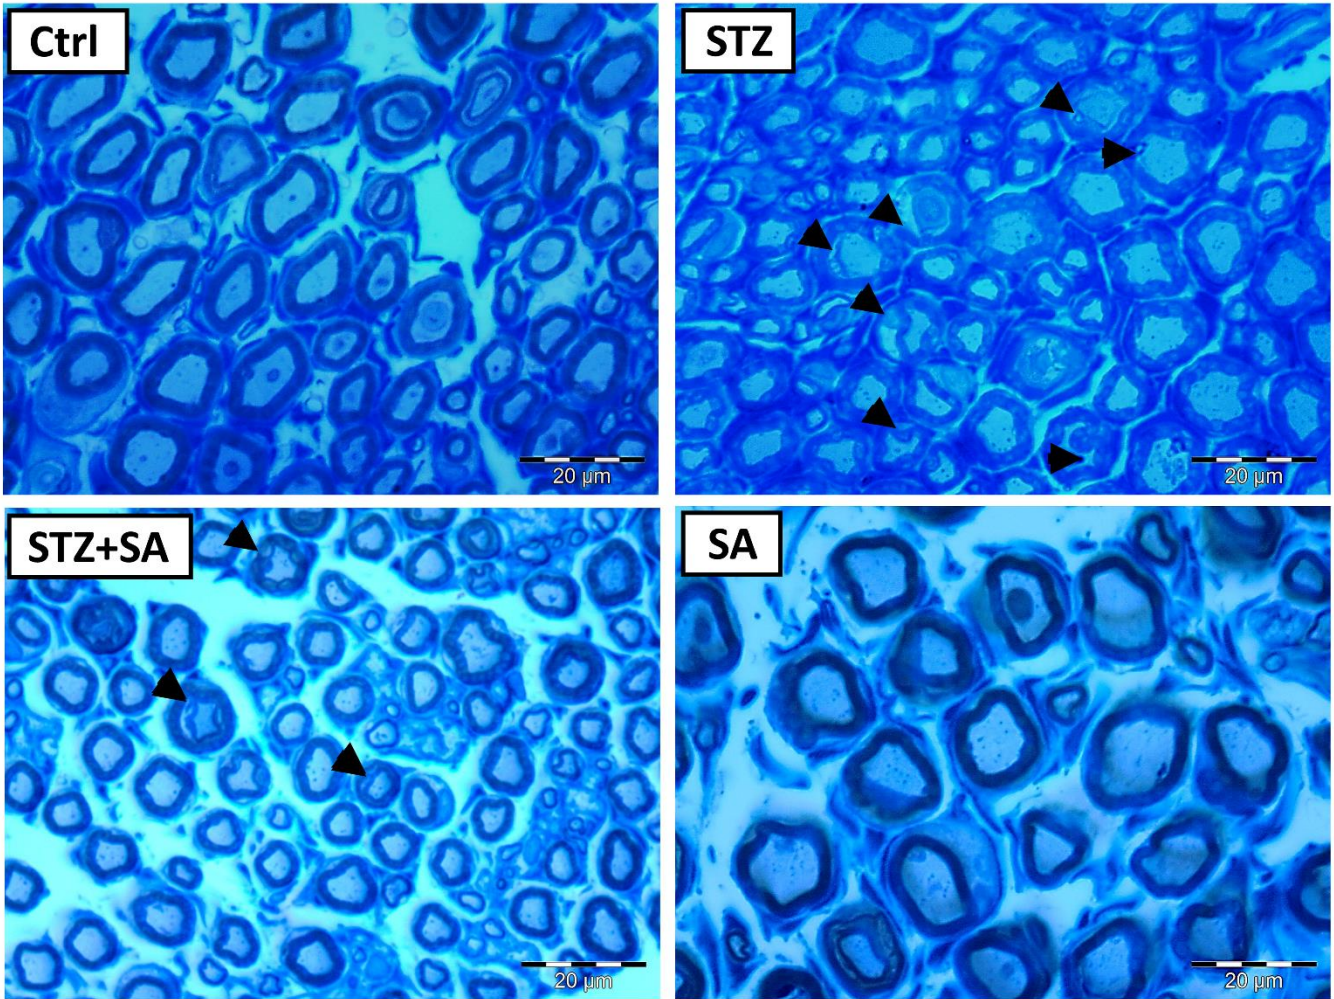

**Suppl. Figure 1.** Representative photomicrographs of sciatic nerve from different groups, i.e., Ctrl: control, STZ: streptozotocin (diabetic), STZ+SA: streptozotocin+sodium alginate, and SA: sodium alginate). Treatment of rats with SA (200 mg/kg b.w.) for 28 days results in reduction of nerve lesions (arrowheads) in diabetic model. Toluidine blue stained sections. Scale bar: 20 µm.
