# Supplementary material for: Mitigative effect of sodium alginate on streptozotocin (STZ)-induced diabetic neuropathy through regulation of redox status and miR-146a in the rat sciatic nerve
Source: PeerJ. 2025 Mar 24;13:e19046. doi: 10.7717/peerj.19046 (PMC11949120; doi:10.7717/peerj.19046)
Supplement: Supplemental Information 1 [file peerj-13-19046-s001.xlsx]

## Sheet: Sheet1
No.	Groups	Insulin	Glucose	HOMA-IR	TC	TG	VLDL	HDL	LDL	Lipase	Incretin	GSH	SOD	CAT	MDA	GPx	NO	AGE	IL-1ß	IL-6	TNF-α	Caspase-3	miR-146a
1	Control	2.9	82.1	0.587877	80.7	110	22	38	20.7	32.9	15.8	41	34.6	49.5	6.3	10	7.3	42	19.7	3.1	31	10.5	0.999763
1	Control	3.1	101.2	0.774617	64.3	89.6	17.92	41	5.38	31	13.7	67	35.9	47.8	4.4	10.8	8.9	44	21	2.5	36	8.9	1.36852
1	Control	2.7	95.4	0.636	63.8	95.7	19.14	34	10.66	28.7	14.1	42	33.5	43	5.7	9.7	9.2	41	22.3	2.1	33.5	9.5	0.999999
1	Control	2.5	92.9	0.573457	81.5	108.6	21.72	46	13.78	29.9	12.8	43	32	38.1	4.7	11.6	10.9	39	23.4	1.9	34.8	7	0.919087
1	Control	2.7	79.6	0.530667	87.4	112	22.4	48	17	30.6	13.8	37	36.5	40	2.9	9.4	8.1	47	20.7	2.7	32.7	10.6	0.795234
2	STZ	0.81	455.8	0.9116	165.8	277.3	55.46	15.7	94.64	10.2	3.4	11.5	11.2	19.1	19.1	3.5	23.7	78	43.3	9.2	62.3	19.9	0.318565
2	STZ	0.95	369.8	0.867432	142.3	297.7	59.54	17.7	65.06	16.7	4.8	18.8	15.9	12.8	16.2	3.9	22.9	83	38.8	8.2	65.1	18	0.514596
2	STZ	1	420.1	1.03728	195.7	362.5	72.5	15.2	108	17.9	5.9	14.1	16.1	16.9	15.9	4.2	18.9	82	39.9	11.3	68	17.9	0.276592
2	STZ	0.78	424	0.816593	129.3	184.6	36.92	21	71.38	11.7	4.2	12	12.3	15.9	16.1	4.4	19.9	75	41	10.8	59.1	21	0.32029
2	STZ	0.42	555.4	0.57597	169.3	261.1	52.22	23	94.08	13.4	5	10.2	14	14.8	16.6	3.1	19.5	79	40.5	10	63	18.6	0.229488
3	STZ+SA	1.62	248.5	0.994	109.3	172.6	34.52	26	48.78	22	8.9	25.8	26.3	21.8	12	6.2	13.7	54	31	7.2	50.5	13.9	0.726147
3	STZ+SA	1.8	251	1.11556	107.8	148.6	29.72	28	50.08	24.5	7.8	23.4	26.1	28	10.8	6.9	17.3	49	29.8	6.3	42.3	14	1.21918
3	STZ+SA	1.35	187.4	0.624667	90.3	145	29	31	30.3	26.7	6.9	29.3	25	32	9.5	7.6	12.4	66	30.8	8	45.8	16.3	0.681357
3	STZ+SA	1.55	241.4	0.923877	103.1	167.4	33.48	30	39.62	21.3	7.5	22.7	22.9	28.9	11	7	15.3	62	27	6.1	40.1	14.2	2.18698
3	STZ+SA	2	195.2	0.963951	109.7	178.4	35.68	29	45.02	24.9	8.3	24.3	24	33	7.9	5.9	13.2	59	26.9	6.9	42.9	15	0.971374
4	SA	2.6	78.6	0.504593	73.2	104.2	20.84	43	9.36	31	13.3	45	36.6	42	6.2	9.9	10.1	39	19.8	2.1	31	12	1.16446
4	SA	2.7	72.7	0.484667	77.9	99.7	19.94	47	10.96	29.8	12.8	40	39.6	40.6	6.7	11	6.6	43	22.3	3	32.9	10.6	1.15597
4	SA	2.9	104.7	0.749704	79.5	109.5	21.9	39	18.6	34	15	43	29.3	39.5	4.5	12.1	8.6	46	21.6	2.7	36	10.9	1.10685
4	SA	2.3	86.9	0.493506	67.9	82.1	16.42	36	15.48	31.5	14.2	35	31	47.1	4.2	8.9	8.8	41	20.7	2.2	33.5	11.4	1.24719
4	SA	2.55	102.2	0.643481	77.2	98.5	19.7	42	15.5	32.4	13.3	39	33.9	48.1	4	9.5	7.9	47	18	1.9	35.1	11.6	1.16754
