# Supplementary material for: Mitigative effect of sodium alginate on streptozotocin (STZ)-induced diabetic neuropathy through regulation of redox status and miR-146a in the rat sciatic nerve
Source: PeerJ. 2025 Mar 24;13:e19046. doi: 10.7717/peerj.19046 (PMC11949120; doi:10.7717/peerj.19046)
Supplement: Supplemental Information 2 [file peerj-13-19046-s002.xlsx]

## Sheet: miR-146a
Control	Sample	miR-146a	Ct U6	∆Ct	∆∆Ct	2^-∆∆Ct	mean 2^-∆∆Ct
	Sample1	36.8	20.45	16.35	0.000341998	0.999763	1.01652				average ∆Ct control		16.3497
	Sample2	36.4195	20.5224	15.897	-0.45262	1.36852
	Sample3	36.8024	20.4528	16.3497	1.99768e-06	0.999999
	Sample4	36.5463	20.0749	16.4714	0.121726	0.919087
	Sample5	37.4438	20.7636	16.6802	0.330549	0.795234
SA	Sample1	37.36	21.23	16.13	-0.219658	1.16446	1.1684
	Sample2	37.32	21.1794	16.1406	-0.209104	1.15597
	Sample3	37.33	21.1268	16.2032	-0.146464	1.10685
	Sample4	37.42	21.389	16.031	-0.318686	1.24719
	Sample5	37.3575	21.2313	16.1262	-0.223478	1.16754
STZ	Sample1	38.52	20.52	18	1.65034	0.318565	0.331906
	Sample2	38.2054	20.8972	17.3081	0.958488	0.514596
	Sample3	38.6042	20.4004	18.2038	1.85417	0.276592
	Sample4	38.5127	20.5205	17.9922	1.64255	0.32029
	Sample5	38.7375	20.2643	18.4732	2.12351	0.229488
STZ+SA	Sample1	38.6617	21.8503	16.8113	0.461667	0.726147	1.15701
	Sample2	38.8881	22.8243	16.0637	-0.285912	1.21918
	Sample3	39.58	22.6768	16.9032	0.553518	0.681357
	Sample4	37.3973	22.1766	15.2207	-1.12894	2.18698
	Sample5	37.8137	21.4221	16.3916	0.0419007	0.971374
